# Supplementary material for: Changes in the tropical upper tropospheric zonal momentum balance due to global warming
Source: Copernicus journal article supplement (doi:10.5194/egusphere-2023-2779), 2023-11-27
Supplement: Supplementary file 1 [file egusphere-2023-2779-supplement.pdf]

# Supplementary Material for Changes in the tropical upper tropospheric zonal momentum balance due to global warming

Abu Bakar Siddiqui Thakur<sup>1,2</sup> and Jai Sukhatme<sup>1,2</sup>

<sup>1</sup>Centre for Atmospheric and Oceanic Sciences, Indian Institute of Science, Bangalore 560012, India

<sup>2</sup>Divecha Centre for Climate Change, Indian Institute of Science, Bangalore 560012, India

**Correspondence:** Abu Bakar Siddiqui Thakur (thakur.abubakar@gmail.com)

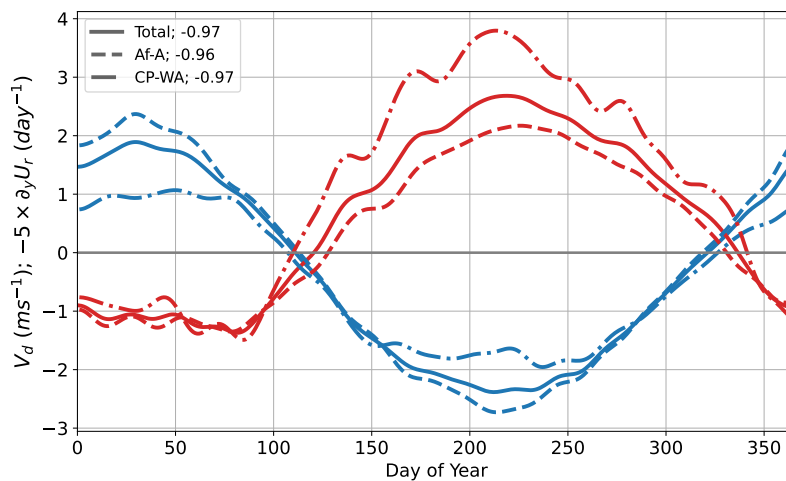

**Figure S1.** Climatological Day of Year variation of  $v_d$  (blue) and  $-5 \times \partial_y u_r$  (red) zonally averaged over all longitudes (solid), A-Af (dashed), CP-WA (dash-dotted) and Africa (dotted). As Figures 1 and 3, all quantities are averaged over 150-300 hPa, about  $\pm 5^\circ$ .  $-\partial_y u_r$  has been multiplied by 5 to ensure a vertical scale similar to  $v_d$ . A 20-day low-pass filter has been applied prior to presentation.

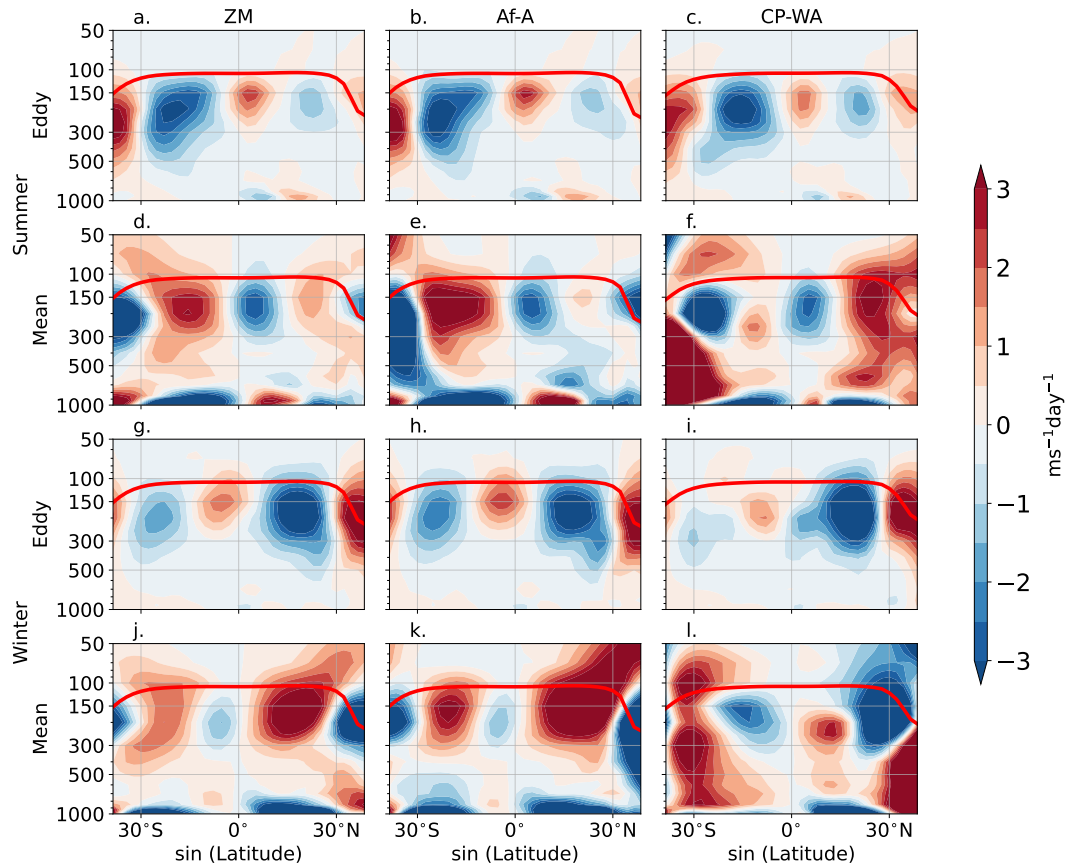

**Figure S2.** Seasonally and zonally averaged vertical structure of (a-c & g-i) eddy momentum flux convergence and (d-f & j-l) mean meridional momentum flux convergence for reanalysis, averaged over (top half) summer and (bottom half) winter. The quantities displayed are computed over (left column) the global longitudes, (middle) Af-A and (right) CP-WA, respectively. In each panel, the black curve is indicative of the multi-model mean tropopause height over the corresponding region (see Reichler et al., 2003).

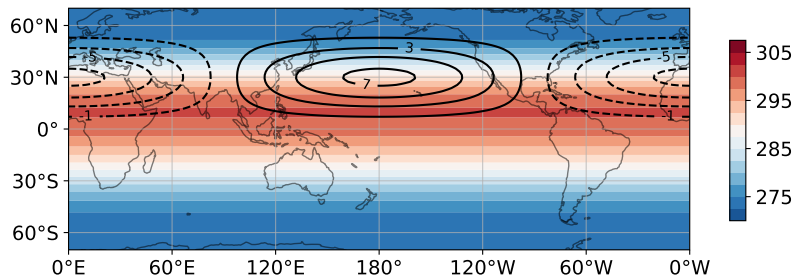

**Figure S3.** Zonally symmetric SST forcing (K) with peak at  $10^{\circ}\text{N}$  superimposed with a planetary scale wavenumber-1 SST perturbation located at  $30^{\circ}\text{N}$  (Wu and Shaw, 2016). Peak magnitude of the SST perturbation is 7.5K.

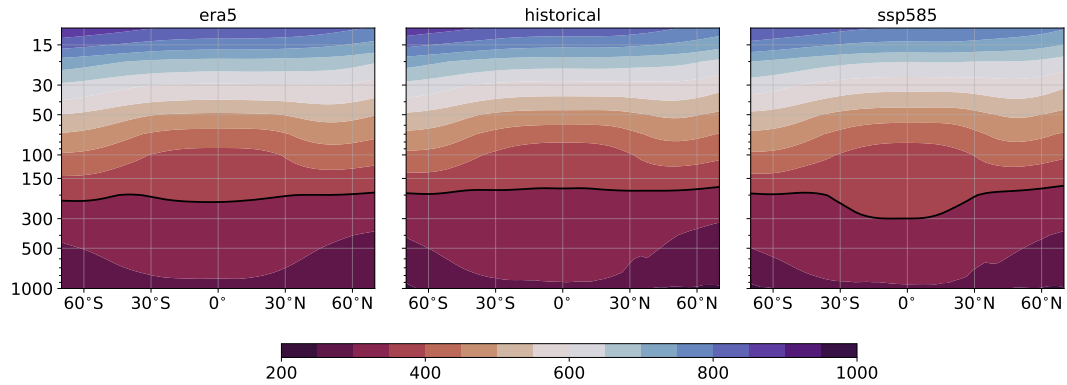

**Figure S4.** Latitude-height section of zonal mean potential temperature for (left) historical and (right) ssp585.

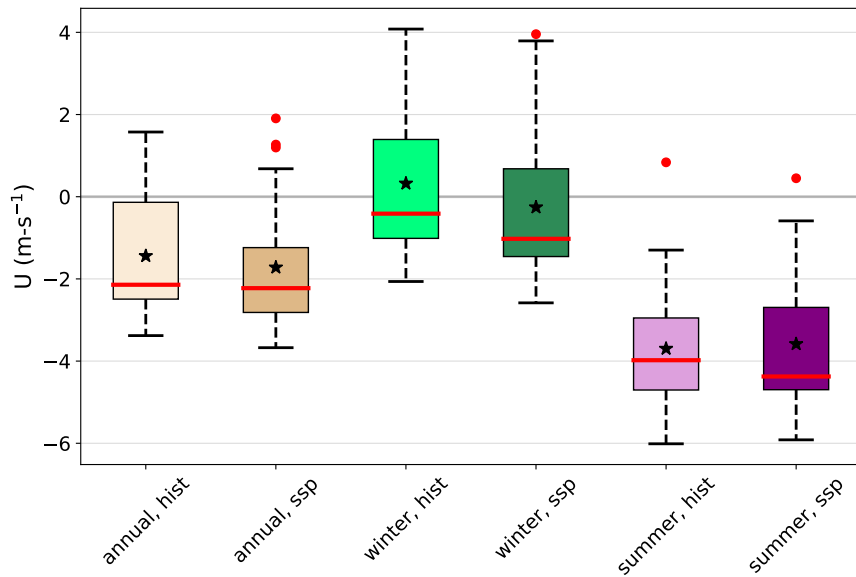

**Figure S5.** Temporally and zonally averaged zonal wind spread for the CMIP6 fully coupled simulations for averaged over  $\pm 5^\circ$  of the equator and 150-300 mbar. The data represented are annual, winter, and summer season means for the control and forced multi-model ensembles. Points marked with black stars indicate the mean, while the horizontal red lines indicate the median. The lower value indicated by the box plot is the first quartile ( $Q_1$ ), while the upper value is the third quartile ( $Q_3$ ). For each box plot, the reach of the whiskers is  $1.5 \times IQR$  beyond  $Q_1$  and  $Q_3$ , where  $IQR = Q_3 - Q_1$ . The red dots are outliers.

## References

Reichler, T., Dameris, M., and Sausen, R.: Determining the tropopause height from gridded data, *Geophysical research letters*, 30, <https://doi.org/10.1029/2003GL018240>, 2003.

5 Wu, Y. and Shaw, T. A.: The impact of the Asian summer monsoon circulation on the tropopause, *Journal of Climate*, 29, 8689–8701, <https://doi.org/10.1175/JCLI-D-16-0204.1>, 2016.
